# Supplementary material for: Configurable switching behavior in polymer-based resistive memories by adopting unique electrode/electrolyte arrangement
Source: Royal Society of Chemistry journal article supplement (doi:10.1039/d1ra03561d), 2021-01-01
Supplement: d1ra03561d1.pdf [file d1ra03561d1.pdf]

Electronic Supplementary Material (ESI) for RSC Advances

## **Configurable Switching Behavior in the Polymer-based Resistive Memories by Adopting Unique Electrode/Electrolyte Arrangement**

<sup>a</sup>Karthik Krishnan\*, <sup>a</sup>Shaikh Mohammad Tauquir, <sup>a</sup>Saranyan Vijayaraghavan, and <sup>b</sup>Ramesh Mohan

<sup>a</sup>Corrosion and Material Protection Division, CSIR-Central Electrochemical Research Institute,  
Karaikudi, Tamil Nadu-630003, India.

<sup>b</sup>Microsystem Packaging Group, CSIR-Central Electronics Engineering Research Institute, Pilani,  
Rajasthan-333031, India. E-mail: [karthikk@cecri.res.in](mailto:karthikk@cecri.res.in)

| <b>S. No</b> | <b>Content</b>                                                                                                                                   | <b>Page no.</b> |
|--------------|--------------------------------------------------------------------------------------------------------------------------------------------------|-----------------|
| 1            | Current–voltage ( $I-V$ ) plot of forming processes                                                                                              | S-2             |
| 2            | Log $I-V$ plot and corresponding linear $I-V$ plot                                                                                               | S-3             |
| 3            | The depth-profiling XPS spectra of Al/PMMA/Al pristine device                                                                                    | S-4             |
| 4            | O 1s signals of the depth-profiling XPS spectra of Al/AgNP-PMMA/Al                                                                               | S-4             |
| 5            | Ag 3d signals of the depth-profiling XPS spectra of Al/AgNP-PMMA/Al                                                                              | S-5             |
| 6            | O 1s signal of the depth-profiling XPS spectra of the Al/Ag/PMMA/Al device                                                                       | S-5             |
| 7            | Atomic force microscopy (AFM) images of PMMA film                                                                                                | S-6             |
| 8            | Table: The mean value ( $\mu$ ) and standard deviation ( $\sigma$ ) of the $V_{\text{SET}}/V_{\text{RESET}}$ and $R_{\text{LRS}}/R_{\text{HRS}}$ | S-7             |

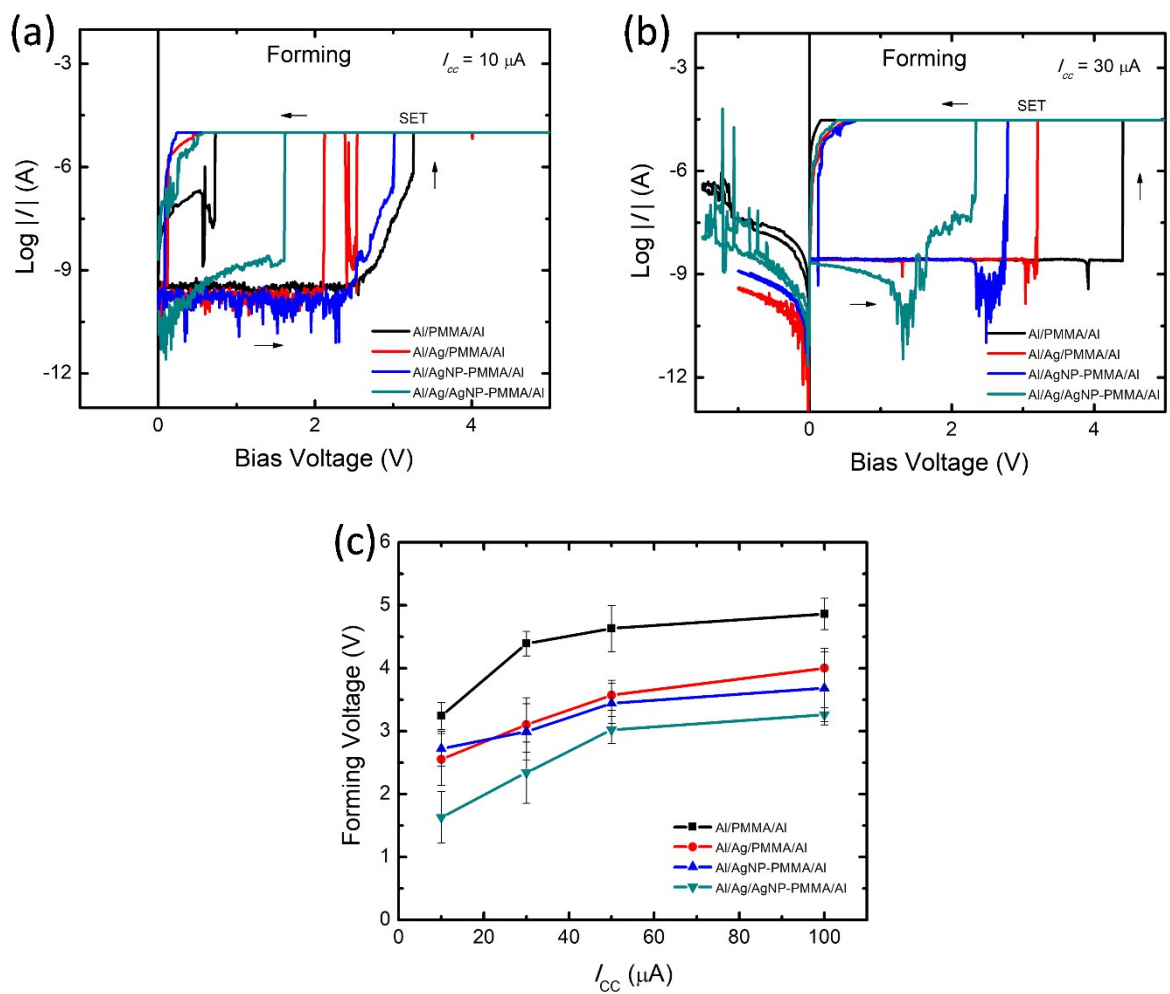

**Fig. S1** The  $I$ - $V$  plots of the forming process of the devices measured under (a)  $I_{CC} = 10 \mu\text{A}$ , (b)  $I_{CC} = 30 \mu\text{A}$  and (c) the plot between  $I_{CC}$  and forming voltage (evaluated from the  $I$ - $V$  data of 5 devices at each  $I_{CC}$ ).

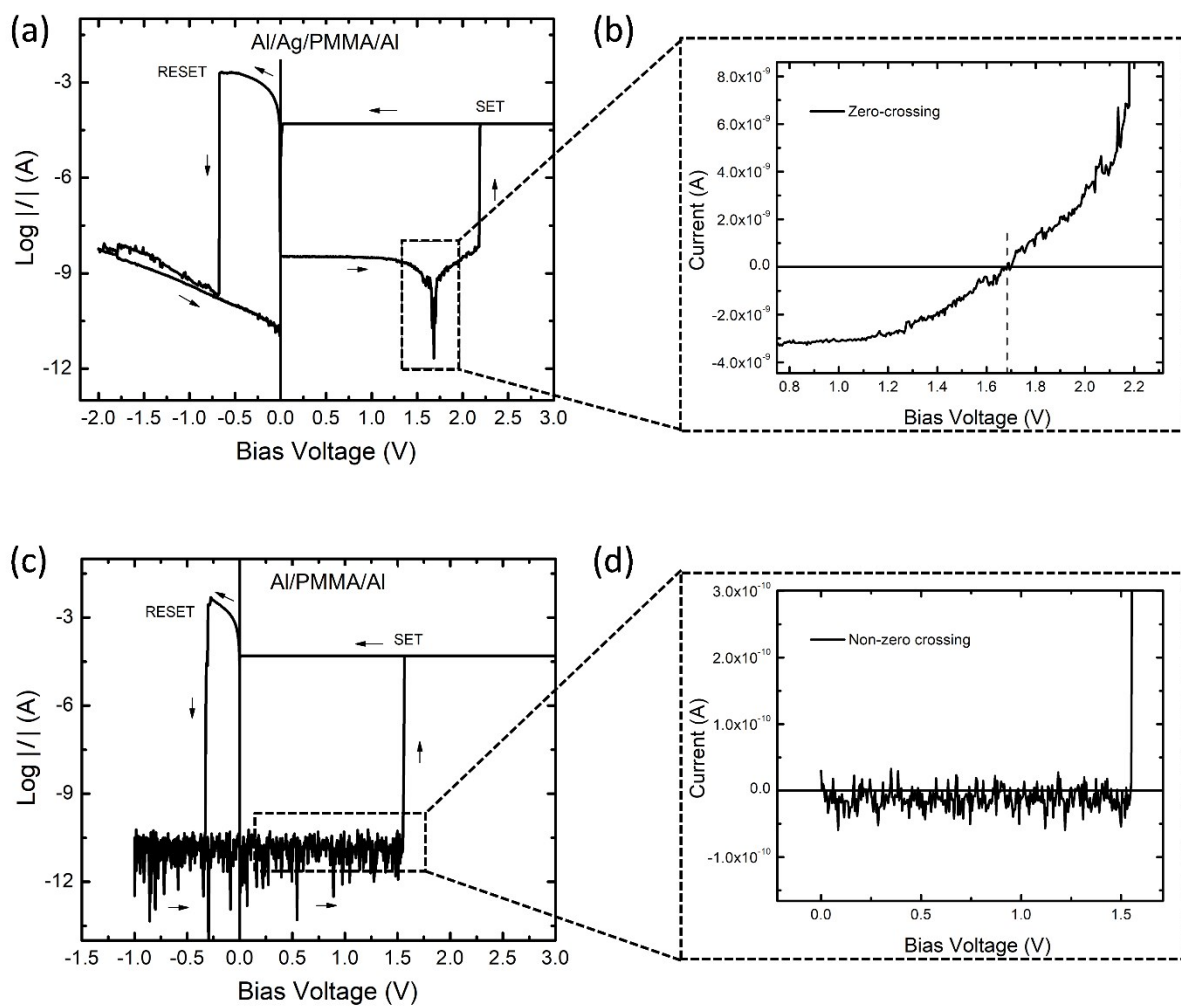

**Fig. S2** (a and c) The current minimum in a logarithmic scale of the  $I-V$  behaviour, corresponding to a (b) zero-current crossing point and (d) non-zero current crossing in a linear scale of the Al/Ag/PMMA/Al and Al/PMMA/Al devices, respectively.

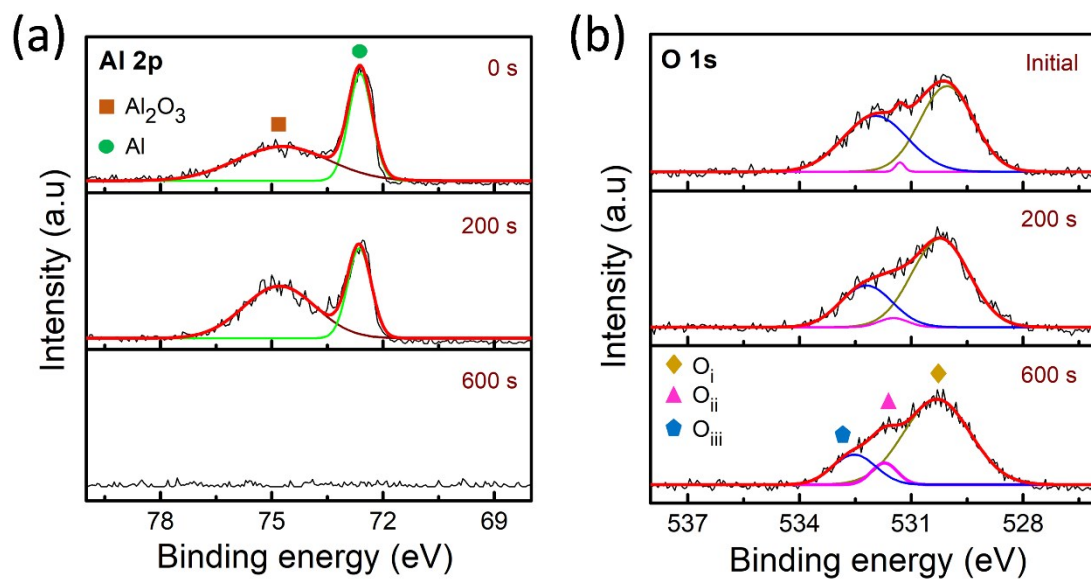

**Fig. S3** Depth-profiling XPS scans of (a) Al 2p and (b) O 1s signals of the pristine Al/PMMA/Al device (HRS).

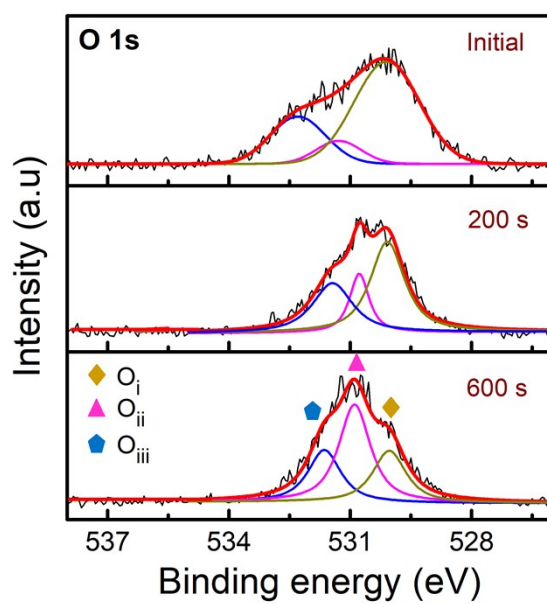

**Fig. S4** O 1s signals of the depth-profiling XPS spectra of Al/AgNP-PMMA/Al device.

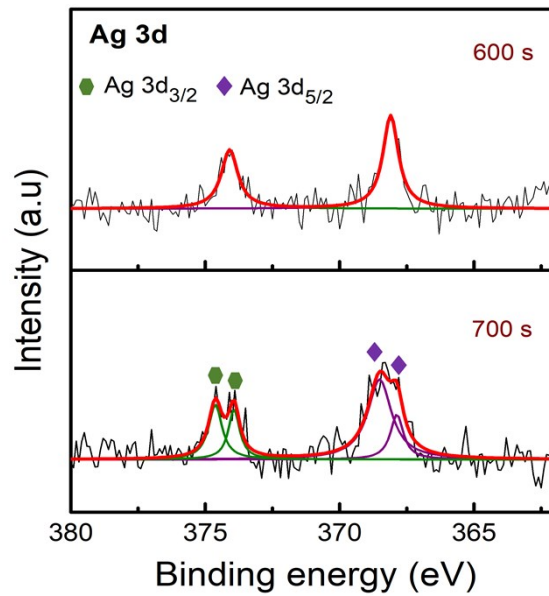

**Fig. S5** Ag 3d signals of the depth-profiling XPS spectra of Al/AgNP-PMMA/Al device.

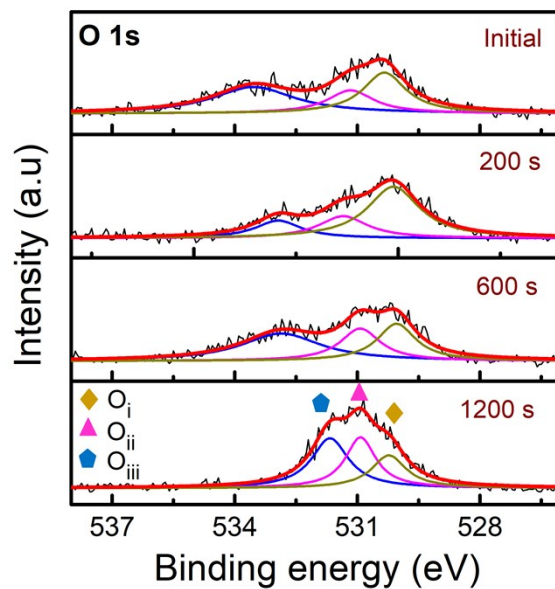

**Fig. S6** O 1s signals of the depth-profiling XPS spectra of Al/Ag/PMMA/Al device.

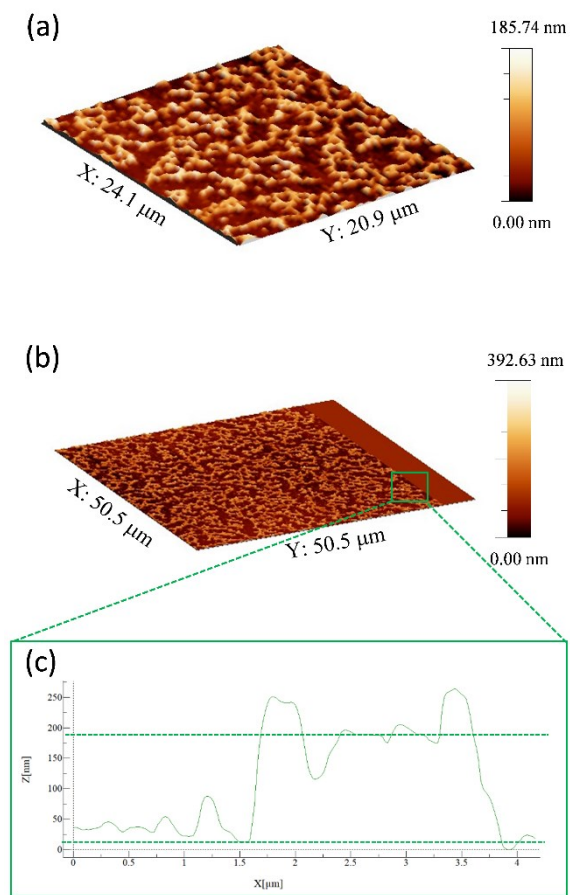

**Fig. S7** (a) AFM image of the pure PMMA film and (b) AFM image of the etched film and (c) the corresponding thickness variation profile. The thickness of film is  $\sim 200$  nm.

**Table S1.** The mean value ( $\mu$ ) and standard deviation ( $\sigma$ ) of the  $V_{\text{SET}}/V_{\text{RESET}}$  and  $R_{\text{LRS}}/R_{\text{HRS}}$  data of all the devices

| Device             | Mean value ( $\mu$ ) / Standard deviation ( $\sigma$ ) |                        | Mean value ( $\mu$ ) / Standard deviation ( $\sigma$ ) |                                            |
|--------------------|--------------------------------------------------------|------------------------|--------------------------------------------------------|--------------------------------------------|
|                    | $V_{\text{SET}}$ (V)                                   | $V_{\text{RESET}}$ (V) | $R_{\text{LRS}}$ ( $\Omega$ )                          | $R_{\text{HRS}}$ ( $\Omega$ )              |
| Al/PMMA/Al         | 2.28/ 0.70                                             | -0.48/ 0.29            | 165.7/ 211.6                                           | $2.59 \times 10^9$ / $2.64 \times 10^9$    |
| Al/Ag/PMMA/Al      | 2.30/ 0.74                                             | -0.88/ 0.38            | 218.5/ 210.2                                           | $4.58 \times 10^7$ / $4.94 \times 10^7$    |
| Al/AgNP-PMMA/Al    | 2.37/ 0.63                                             | -0.44/ 0.17            | 67.9/ 117.7                                            | $6.50 \times 10^9$ / $1.16 \times 10^{10}$ |
| Al/Ag/AgNP-PMMA/Al | 1.73/ 0.61                                             | -0.36/ 0.17            | 419.8/ 312.1                                           | $4.65 \times 10^7$ / $4.23 \times 10^7$    |
